# Supplementary material
Source: PubMed Central journal article supplement (PMC7965768)
Supplement: 3669_table.pdf [file 3669_table.pdf]

**On-line Table: Clinical characteristics of patients demonstrating lesions within the anterior superior temporal subcortical white matter**

| Case | Age at Presentation (y) | Sex (F/M) | Clinical Indication for First Brain MR Imaging                                                                                                                            | Subsequent Development of Neurologic Symptoms                                                                                                           |
|------|-------------------------|-----------|---------------------------------------------------------------------------------------------------------------------------------------------------------------------------|---------------------------------------------------------------------------------------------------------------------------------------------------------|
| 1    | 48                      | M         | Cluster headaches                                                                                                                                                         | None                                                                                                                                                    |
| 2    | 63                      | F         | Complex partial seizures for 2.5 years; right frontopolar/inferior frontal focal epileptiform activity on EEG                                                             | Seizure-free with antiepileptogenic medication                                                                                                          |
| 3    | 70                      | M         | Lung cancer, work-up for metastases (no neurologic symptoms)                                                                                                              | Intermittent speech, memory, gait difficulties beginning 7 months after initial MR imaging; diagnosed with progressive supranuclear palsy 2 years later |
| 4    | 34                      | M         | Brain lesion incidentally identified on scout MR imaging sequences of the lumbar spine for chronic back pain                                                              | None                                                                                                                                                    |
| 5    | 56                      | F         | Breast cancer, work-up for metastases (patient complained of altered visual depth perception, which had resolved by the time of the initial MR imaging scan)              | N/A                                                                                                                                                     |
| 6    | 40                      | F         | Single episode of nonspecific neurologic symptoms including bilateral leg heaviness and weakness, gait difficulty, lasting 1 day                                          | Headaches reported on follow-up                                                                                                                         |
| 7    | 47                      | F         | Episodes of transient disorientation followed by severe fatigue, possible temporal lobe seizures                                                                          | Complete recovery postoperatively                                                                                                                       |
| 8    | 49                      | F         | Recurrent headaches                                                                                                                                                       | None                                                                                                                                                    |
| 9    | 86                      | F         | Breast cancer; episodic vertigo, which resolved spontaneously                                                                                                             | None                                                                                                                                                    |
| 10   | 75                      | M         | Rapid progression of memory loss; no focal neurologic signs                                                                                                               | N/A                                                                                                                                                     |
| 11   | 58                      | M         | Brain lesion discovered incidentally on MR imaging scan of face for follow-up of basal cell carcinoma of the eyelid; no neurologic symptoms                               | None                                                                                                                                                    |
| 12   | 40                      | F         | Three-minute episode of aphasia, resolved spontaneously                                                                                                                   | N/A                                                                                                                                                     |
| 13   | 33                      | F         | Severe headache, resolved spontaneously                                                                                                                                   | N/A                                                                                                                                                     |
| 14   | 57                      | M         | Brain lesion discovered incidentally on CT sinuses done for suspected polyposis                                                                                           | N/A                                                                                                                                                     |
| 15   | 41                      | M         | Asperger syndrome, chronic headaches, brain lesion discovered incidentally on MR imaging of internal auditory canals done for investigation of 2-year history of tinnitus | None                                                                                                                                                    |

**Note:**—F indicates female; EEG, electroencephalogram; M, male.
